# Supplementary material for: Surface Modification of Screen-Printed Carbon Electrode through Oxygen Plasma to Enhance Biosensor Sensitivity
Source: Preprints.org preprint supplement (doi:10.20944/preprints202402.0307.v1), 2024-02-06
Supplement: Supplementary file 1 [file supplementary]

Supplementary Materials

Figure S1: Contact angle measurement of plasma treated electrode.

Figure S2: Scanning electron microscopy images observed from after antigen–antibody reaction on plasma-treated electrode (a) and bare electrode (b).

Table S1: Signal values used in the calibration curves.

| O2-plasma treated electrode | | | | | |
| --- | --- | --- | --- | --- | --- |
| IgA [ng/mL] | n1 | n2 | n3 | ave | stdev |
| 100 | 1.77 | 1.80 | 1.64 | 1.74 | 0.09 |
| 50 | 1.87 | 1.80 | 1.42 | 1.69 | 0.24 |
| 10 | 0.53 | 0.44 | 0.43 | 0.47 | 0.05 |
| 5 | 0.14 | 0.27 | 0.13 | 0.18 | 0.08 |
| 0 | 0.00 | 0.01 | 0.01 | 0.01 | 0.01 |
|  |  |  |  |  |  |
| Bare electrode | | | | | |
| IgA [ng/mL] | n1 | n2 | n3 | ave | stdev |
| 100 | 1.46 | 1.37 | 1.93 | 1.59 | 0.30 |
| 50 | 1.47 | 1.40 | 1.30 | 1.39 | 0.09 |
| 10 | 0.56 | 0.85 | 0.80 | 0.74 | 0.16 |
| 5 | 0.55 | 0.45 | 0.60 | 0.53 | 0.07 |
| 0 | 0.32 | 0.34 | 0.33 | 0.33 | 0.01 |
